# Supplementary material for: Left and right ventricular dysfunction in patients with COVID-19-associated myocardial injury
Source: Springer Nature journal article supplement (doi:10.1007/s15010-020-01572-8), 2021-01-30
Supplement: 15010_2020_1572_MOESM1_ESM.pdf [file 15010_2020_1572_MOESM1_ESM.pdf]

## SUPPLEMENTAL DATA TO

### Left and right ventricular dysfunction in patients with COVID-19 associated myocardial injury

#### *Infection*

Stephanie Bieber, MD<sup>1,2,#</sup>, Angelina Kraechan, MD<sup>1,2</sup>, Johannes C. Hellmuth, MD<sup>2,3</sup>, Maximilian Muenchhoff, MD<sup>2,4,5</sup>, Clemens Scherer, MD<sup>1,2,7</sup>, Ines Schroeder, MD<sup>6</sup>, Michael Irlbeck, MD<sup>6</sup>, Stefan Kaeaeab, MD<sup>2,7</sup>, Steffen Massberg, MD<sup>1,7</sup>, Joerg Hausleiter, MD<sup>1,7</sup>, Ulrich Grabmaier, MD<sup>1,2,7</sup>, Mathias Orban, MD<sup>1,7,§</sup> & Ludwig T. Weckbach, MD<sup>1,2,7,8,§,#</sup>

#### # Correspondence to:

##### **Stephanie Bieber**

Medizinische Klinik und Poliklinik I, Klinikum der Universität München  
Ludwig-Maximilians-Universität München  
Marchioninistraße 15, 81377 Munich, Germany  
Phone: +49-89-4400-76085  
Email: Stephanie.Bieber@med.uni-muenchen.de  
ORCID: 0000-0001-5954-5695

**Supplemental Table 1: Echocardiographic findings in COVID-19 patients with myocardial injury initially and on follow up.**

| <i>Number (%) or median (IQR)</i>          | <b>Initial<br/>echocardiography<br/>(n = 18)</b> | <b>Follow up<br/>echocardiography<br/>(n = 12)</b> | <b>p-value</b> |
|--------------------------------------------|--------------------------------------------------|----------------------------------------------------|----------------|
| <b>Systolic left ventricular function</b>  |                                                  |                                                    |                |
| MCF, ratio                                 | 0.47 (0.39-0.55)                                 | 0.47 (0.36-0.53)                                   | 0.286          |
| 3D-LVEF, %                                 | 52 (46-61)                                       | 55 (52-58)                                         | 0.759          |
| LV-GLS, %                                  | -13.9 (-9.3- -16.5)                              | -16.5 (-15.1- -20.7)                               | <b>0.013</b>   |
| <b>Diastolic left ventricular function</b> |                                                  |                                                    |                |
| E/A, ratio                                 | 0.7 (0.7-0.9)                                    | 0.9 (0.7-1.1)                                      | 0.140          |
| Mitral E velocity, cm/s                    | 60.0 (50.1-75.9)                                 | 64.1 (57.5-71.5)                                   | 0.388          |
| Average E/e', ratio                        | 7.6 (5.9-8.9)                                    | 8.9 (7.2-10.7)                                     | <b>0.033</b>   |
| Septal e' velocity, cm/s                   | 6.6 (5.4-8.6)                                    | 7.0 (6.0-8.0)                                      | 0.534          |
| Lateral e' velocity, cm/s                  | 9.3 (8.1-10.8)                                   | 8.5 (6.3-10.5)                                     | 0.424          |
| TR velocity, cm/s                          | 199.4 (123.5-214.5)                              | 180.5 (132.5-229)                                  | 0.767          |
| 3D-LAV index, ml/m <sup>2</sup>            | 44.4 (31.6-52.1)                                 | 36.2 (26-44.1)                                     | 0.155          |
| <b>Right ventricular dimensions</b>        |                                                  |                                                    |                |
| 3D-RVEDV, ml                               | 112.5 (95.4-127.0)                               | 132.4 (101.8-211.1)                                | 0.074          |
| 3D-RVESV, ml                               | 67.5 (57.5-77.7)                                 | 76.6 (61.1-102.6)                                  | 0.093          |
| <b>Systolic right ventricular function</b> |                                                  |                                                    |                |
| Global RV SV, ml                           | 43.6 (31.7-54.3)                                 | 60.5 (35.8-83.7)                                   | 0.139          |
| FAC, %                                     | 37 (29-43)                                       | 43 (40-48)                                         | 0.131          |
| 3D-RVEF, %                                 | 40 (34-44)                                       | 42 (29-50)                                         | 0.959          |
| RV free wall strain, %                     | -18.5 (-13.6- -24.6)                             | -22.3 (-19.6- -27.4)                               | <b>0.037</b>   |

MCF, myocardial contraction fraction; 3D, three-dimensional; LV, left ventricle; RV, right ventricle; LVEF/RVEF, left /right ventricular

ejection fraction; GLS, global longitudinal strain; E/A, ratio of mitral E-wave to A-wave; RV, right ventricle; RA, right atrial; TAPSE, tricuspid

annular plane systolic excursion; FAC, fractional area change; RV-FWS, right ventricular free wall strain; TR, tricuspid regurgitation; LA, left atrial volume; RVEDV, right ventricular end-diastolic volume; RVESV, right ventricular end-systolic volume; SV, stroke volume.
